# Supplementary material
Source: PubMed Central journal article supplement (PMC4325824)
Supplement: AAC.04586-14_zac003153788so1.pdf [file AAC.04586-14_zac003153788so1.pdf]

**TABLE S1** Grading scales used for clinical and endoscopic evaluations of uncomplicated esophageal candidiasis

| Parameter         | Grade                  |                                                  |                                                                   |                                                       |
|-------------------|------------------------|--------------------------------------------------|-------------------------------------------------------------------|-------------------------------------------------------|
|                   | 0                      | 1                                                | 2                                                                 | 3                                                     |
| Dysphagia         | Swallows food normally | Swallows food with difficulty                    | Can swallow soft food/liquids only                                | Can swallow small amounts of liquid or cannot swallow |
| Odynophagia       | None                   | Food causes pain, little or no pain with liquids | Liquid causes pain, will not eat solids                           | Small sips of water only or will not swallow, spits   |
| Retrosternal pain | None                   | Low grade intermittent or continuous pain        | Continuous pain, soreness or burning, may require pain medication | Very painful, requires pain medication                |

  

| Parameter                     | Grade         |                                             |                                             |                                                        |                                                                                |
|-------------------------------|---------------|---------------------------------------------|---------------------------------------------|--------------------------------------------------------|--------------------------------------------------------------------------------|
|                               | 0             | 1                                           | 2                                           | 3                                                      | 4                                                                              |
| Endoscopic mucosal evaluation | Normal mucosa | Individual raised plaques each 2 mm in size | Multiple raised white plaques >2 mm in size | Confluent plaques or plaques combined with ulcerations | Confluent linear <i>Candida</i> plaques with mucosal hyperemia and ulcerations |
